# Supplementary material for: Increasing central and northern European summer heatwave intensity due to forced internal variability changes
Source: Research Square preprint supplement (doi:10.21203/rs.3.rs-6377558/v1), 2025-04-17
Supplement: Supplementary file 1 [file b2b7a7215c281c433c237d74.pdf]

## **Supplementary Material**

for

### **Increasing central and northern European summer heatwave intensity due to forced internal variability changes**

Goratz Beobide-Arsuaga<sup>1\*</sup> (goratz.beobide.arsuaga@uni-hamburg.de), Laura Suarez-Gutierrez<sup>2,3</sup>, Armineh Barkhordarian<sup>1</sup>, Dirk Olonscheck<sup>4</sup>, Johanna Baehr<sup>1</sup>

<sup>1</sup>Institute of Oceanography, Center for Earth System Research and Sustainability (CEN), Universität Hamburg, Hamburg, Germany

<sup>2</sup>Institute for Atmospheric and Climate Science, ETH Zurich, Zurich, Switzerland

<sup>3</sup>Laboratoire des Sciences du Climat et de l'Environnement, Institut Pierre-Simon Laplace, Paris, France

<sup>4</sup>Max Planck Institute for Meteorology, Hamburg, Germany

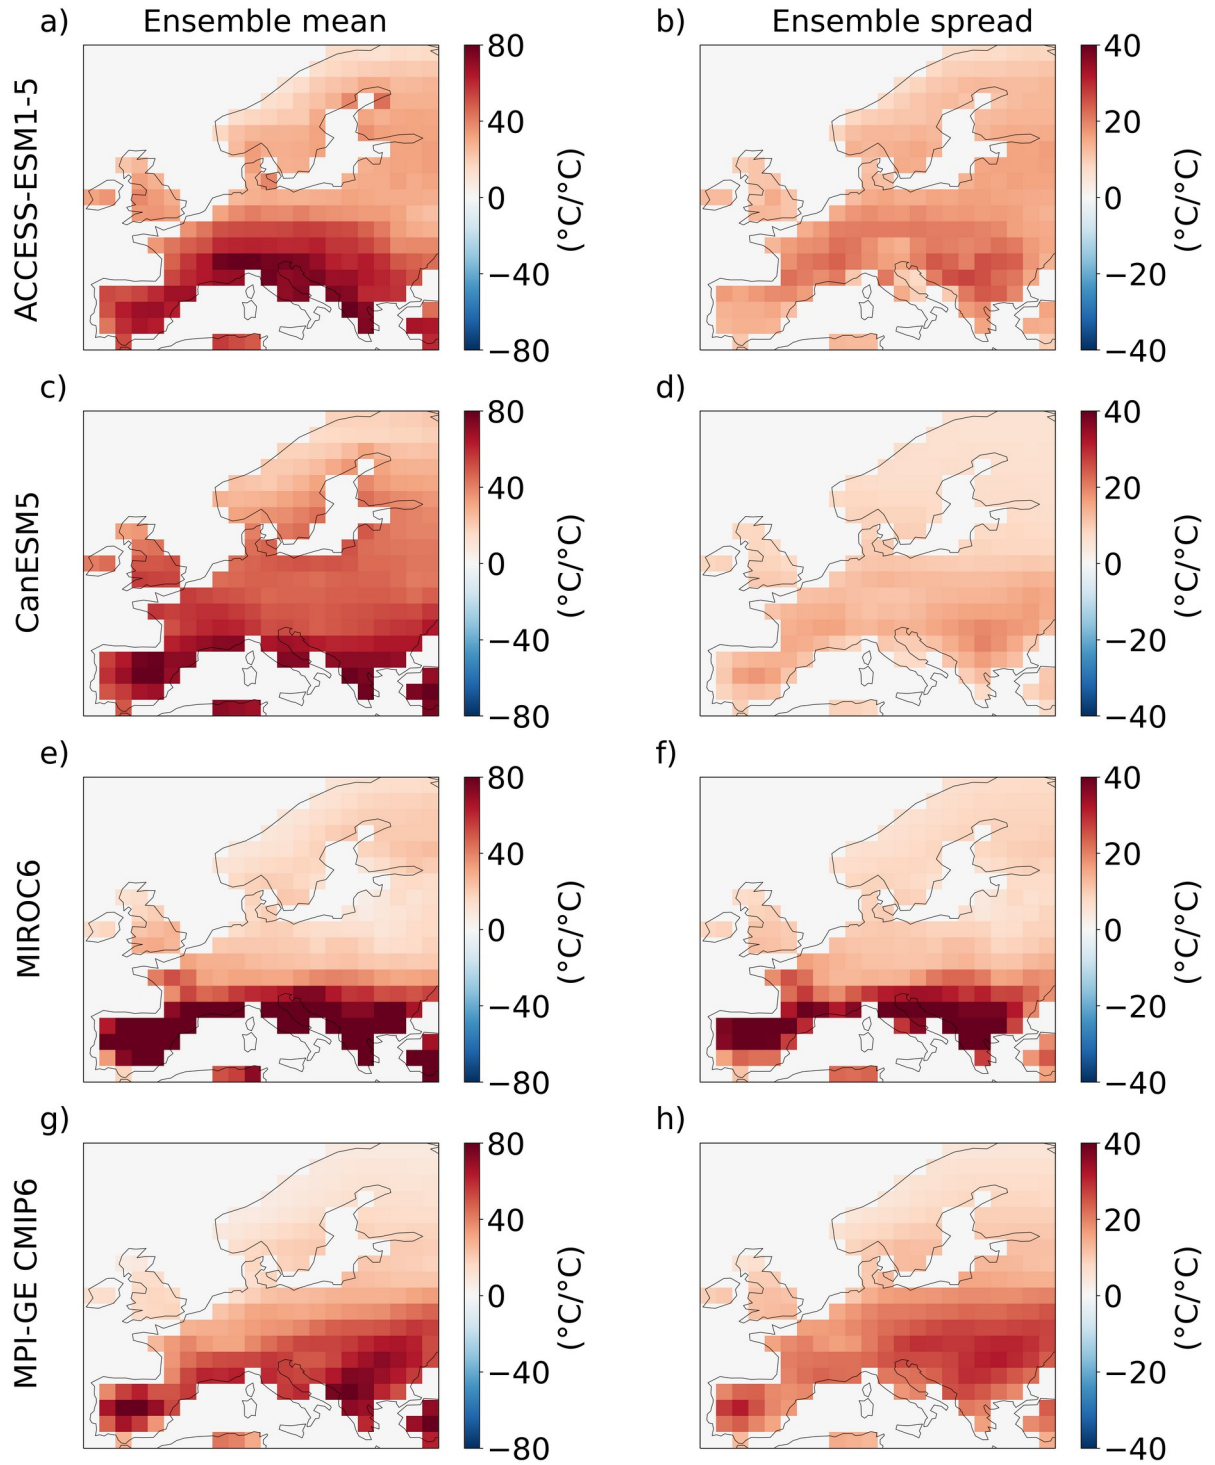

**Supplementary Figure 1: Spatial distribution of changes in European summer heatwave (EuSHW) intensity under global warming levels.** Regression coefficients for the period 2014-2100 and for SSP2-4.5 and SSP5-8.5 scenarios between global mean temperature anomalies relative to 1850-1880 and; a) the forced signal (i.e., ensemble mean) of non-detrended EuSHW cumulative heat for ACCESS-ESM-1.5; b) the range (i.e., ensemble spread computed as ensemble standard deviation) of non-detrended EuSHW cumulative heat due to internal variability for ACCESS-ESM-1.5; c,d) same as a,b) but for CanESM5; e,f) same as a,b) but for MIROC6; g,h) same as a,b) but for MPI-GE CMIP6. The non-dashed regions show significant changes at the 95<sup>th</sup> confidence level.

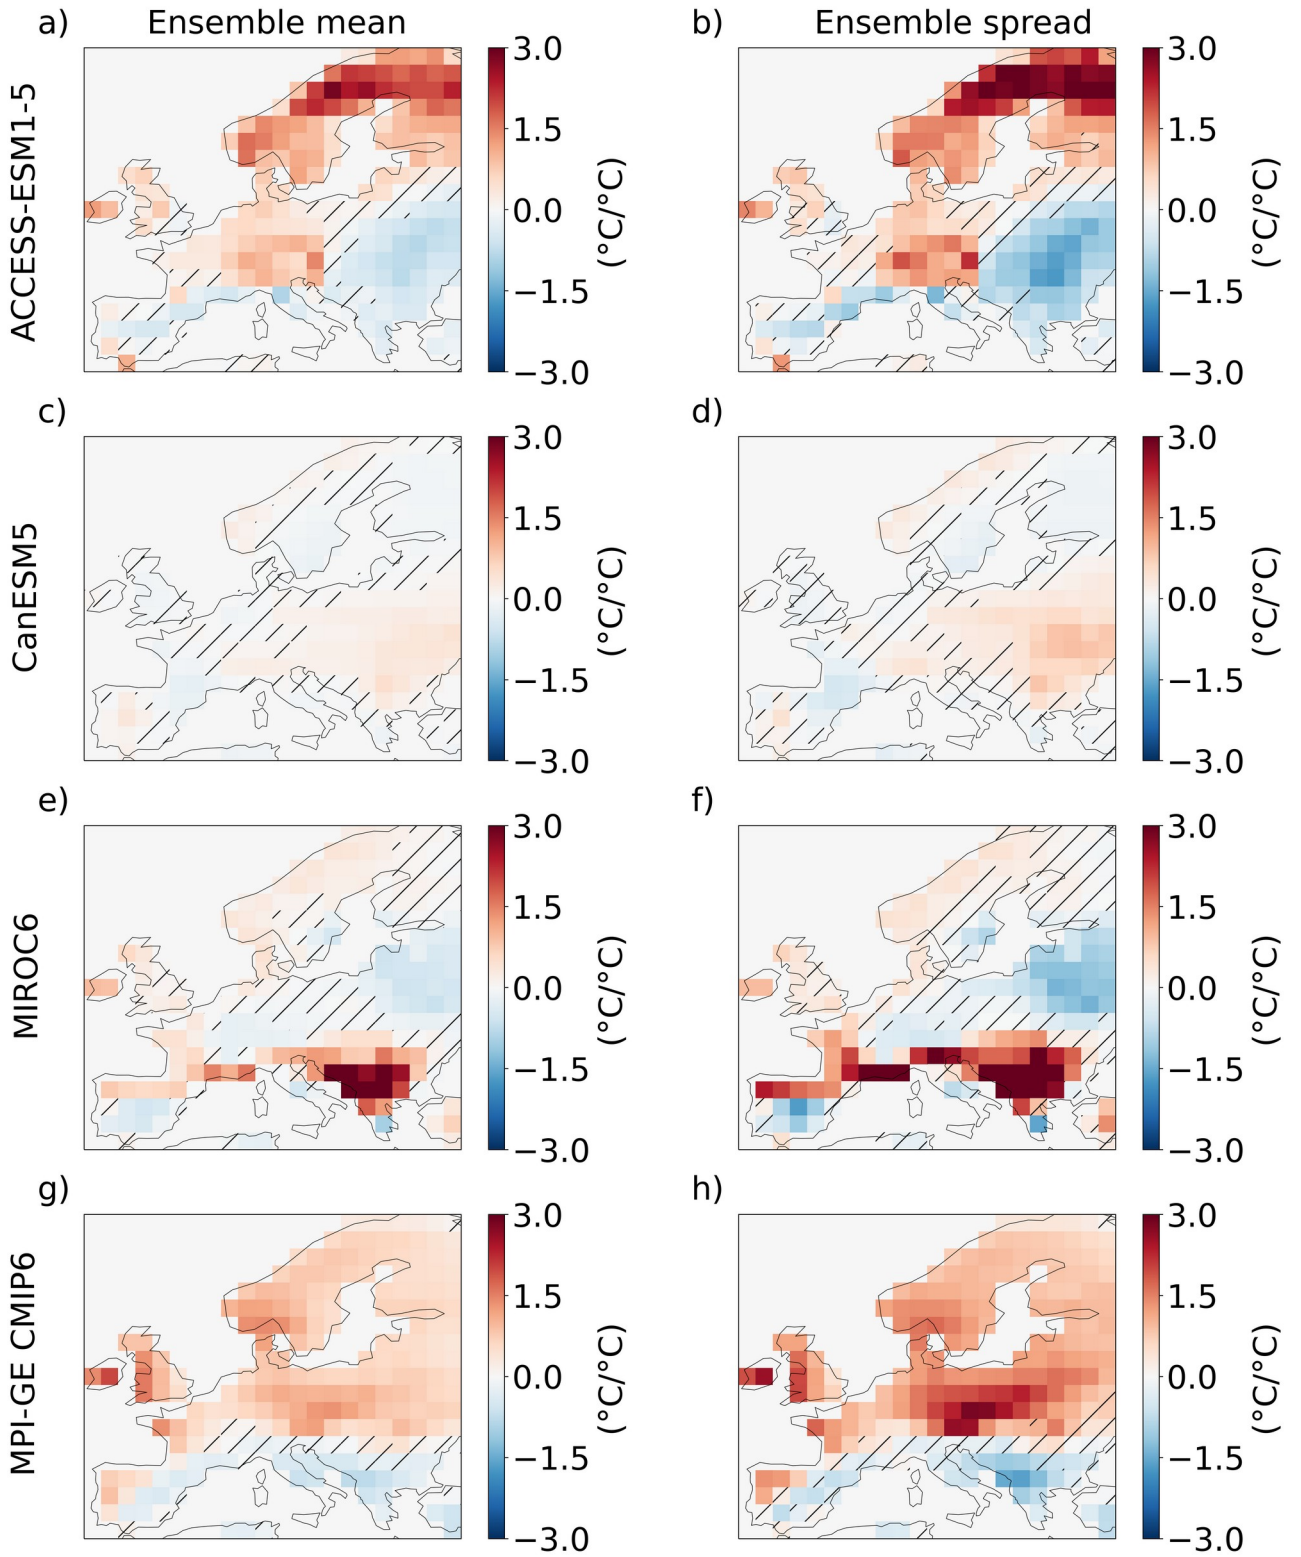

**Supplementary Figure 2: Spatial distribution of changes in European summer heatwave (EuSHW) intensity due to forced changes in internal variability under global warming levels.** Regression coefficients for the period 2014- 2100 and for SSP2-4.5 and SSP5-8.5 scenarios between global mean temperature anomalies relative to 1850-1880 and; a) the forced signal (i.e., ensemble mean) of detrended EuSHW cumulative heat for ACCESS-ESM-1.5; b) the range (i.e., ensemble spread computed as ensemble standard deviation) of detrended EuSHW cumulative heat due to internal variability for ACCESS-ESM-1.5; c,d) same as a,b) but for CanESM5; e,f) same as a,b) but for MIROC6; g,h) same as a,b) but for MPI-GE CMIP6. The non-dashed regions show significant changes at the 95<sup>th</sup> confidence level.

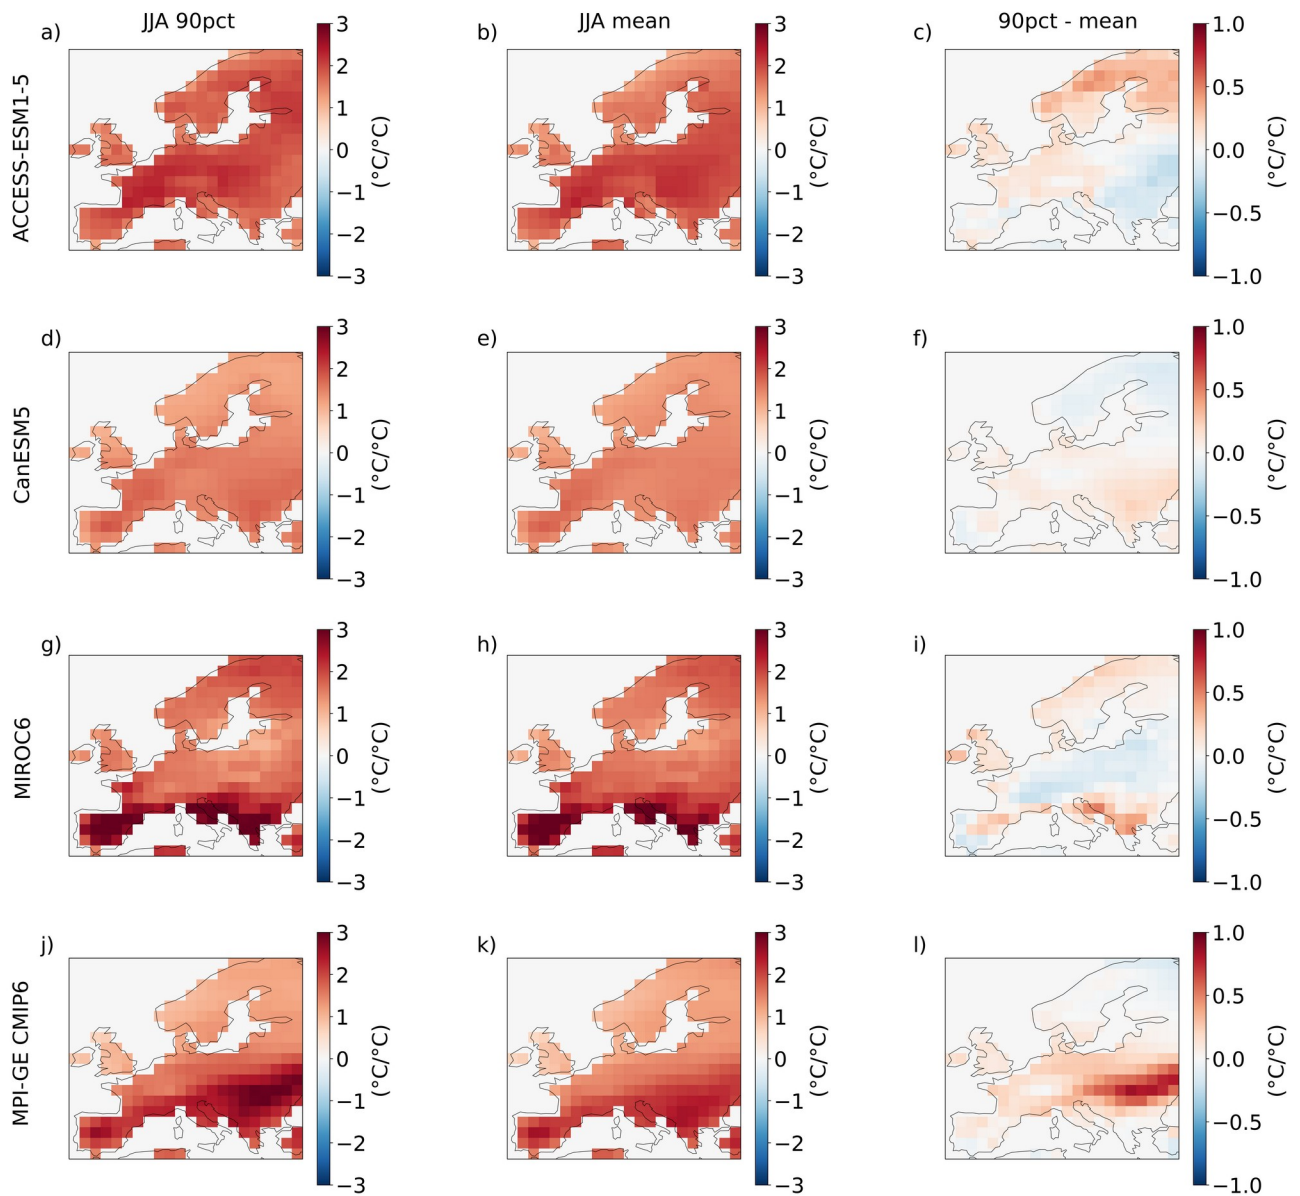

Supplementary Figure 3: **Spatial distribution of the forced signal of summer daily maximum 2m air temperatures ( $T_{2max}$ ) under global warming levels.** Regression coefficients between global mean temperature anomalies relative to 1850-1880 and; a) the forced signal (i.e., ensemble mean) of 90th percentile summer (June, July, August)  $T_{2max}$  for ACCESS-ESM1-5; b) the forced signal (i.e., ensemble mean) of mean summer (June, July, August)  $T_{2max}$  for ACCESS-ESM1-5; c) the difference between a) and b); d-f) same as a-c) but for CanESM5; g-i) same as a-c) but for MIROC6; j-l) same as a-c) but for MPI-GE CMIP6.



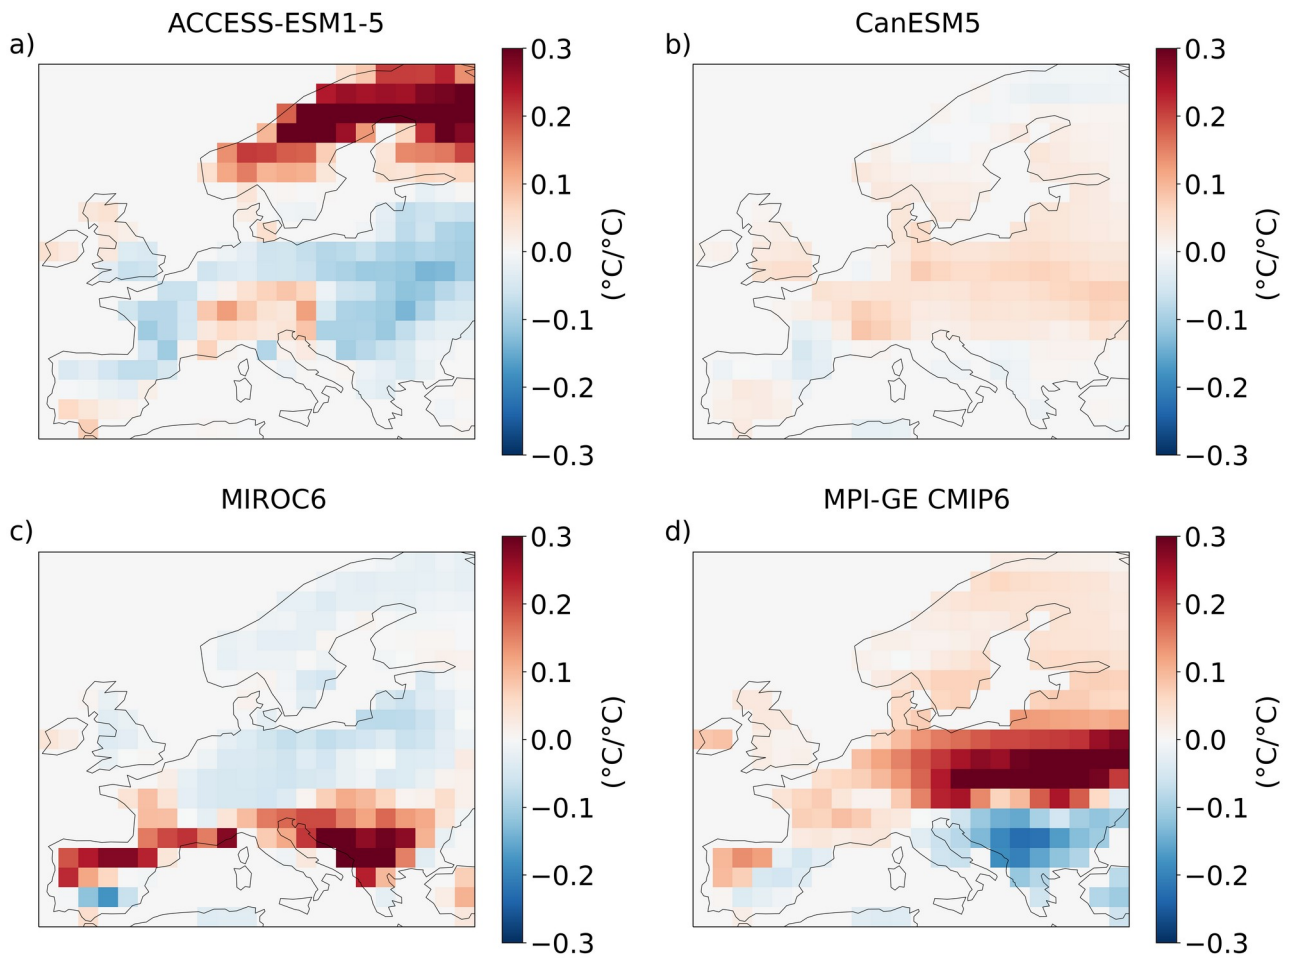

**Supplementary Figure 4: Spatial distribution of extreme summer temperature variability changes under global warming levels.** Regression coefficients between global mean temperature anomalies relative to 1850-1880 and the range (i.e. ensemble spread computed as ensemble standard deviation) of 90th percentile summer (June, July, August) daily maximum 2m air temperatures for; a) ACCESS-ESM-1.5; b) CanESM5; c) MIROC6; d) MPI-GE CMIP6.

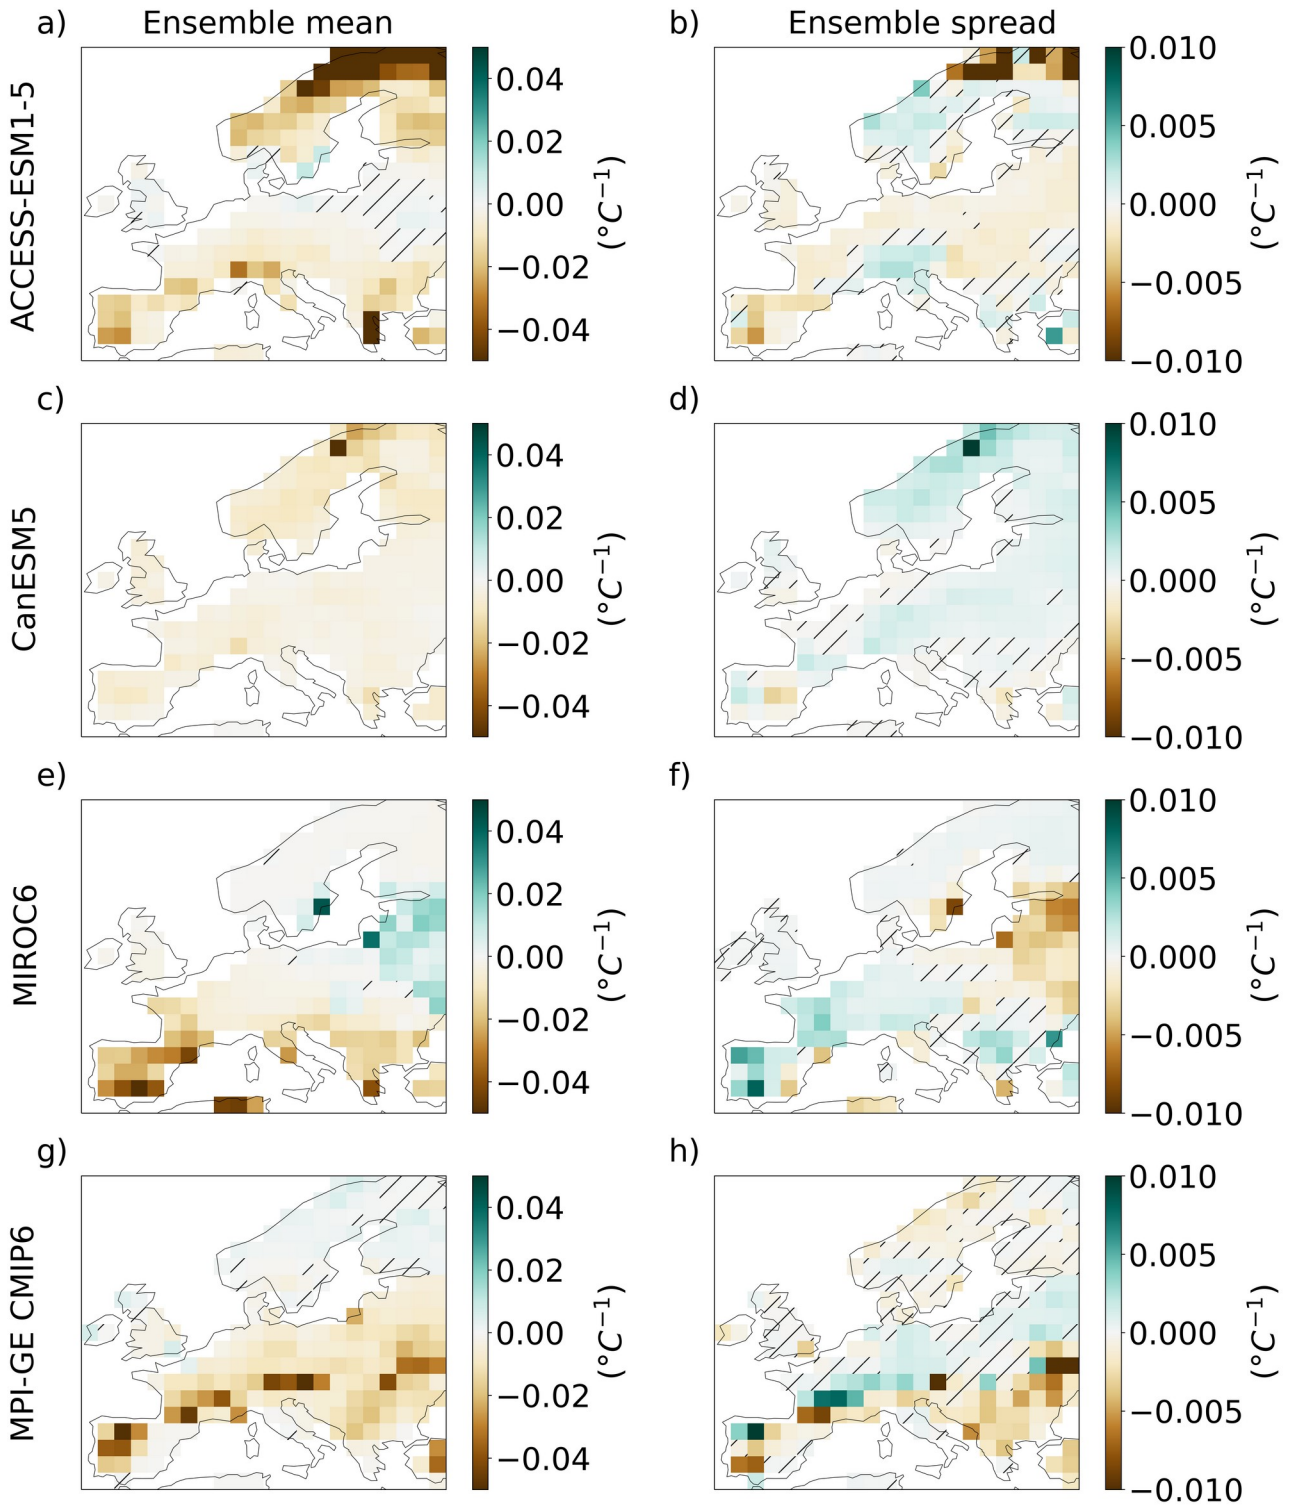

**Supplementary Figure 5: Spatial distribution of changes in soil moisture under global warming levels.** Regression coefficients between global mean temperature anomalies relative to 1850-1880 and; a) the forced signal (i.e., ensemble mean) of summer (June, July, August) mean soil moisture; b) the range (i.e., ensemble standard deviation) of summer mean soil moisture for ACCESS-ESM-1.5; c,d) same as a,b) but for CanESM5; e,f) same as a,b) but for MIROC6; g,h) same as a,b) but for MPI-GE CMIP6. The non-dashed regions show significant changes at the 95<sup>th</sup> confidence level.
